# Supplementary material
Source: PubMed Central journal article supplement (PMC3904267)

Figure S1

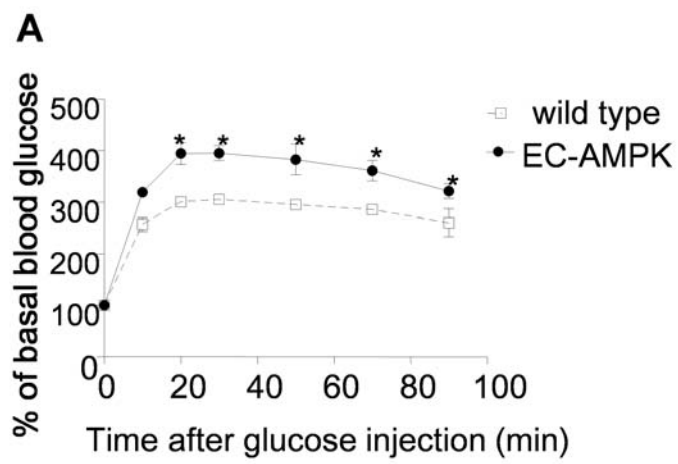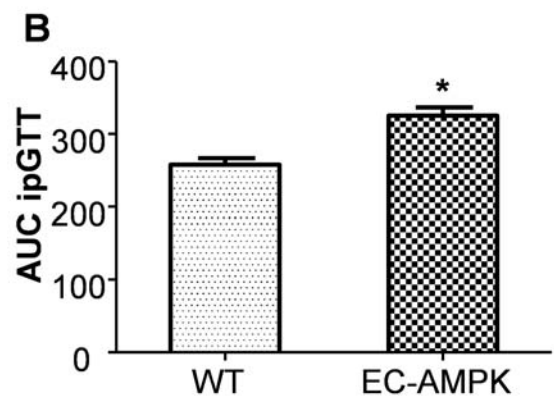

Figure S2

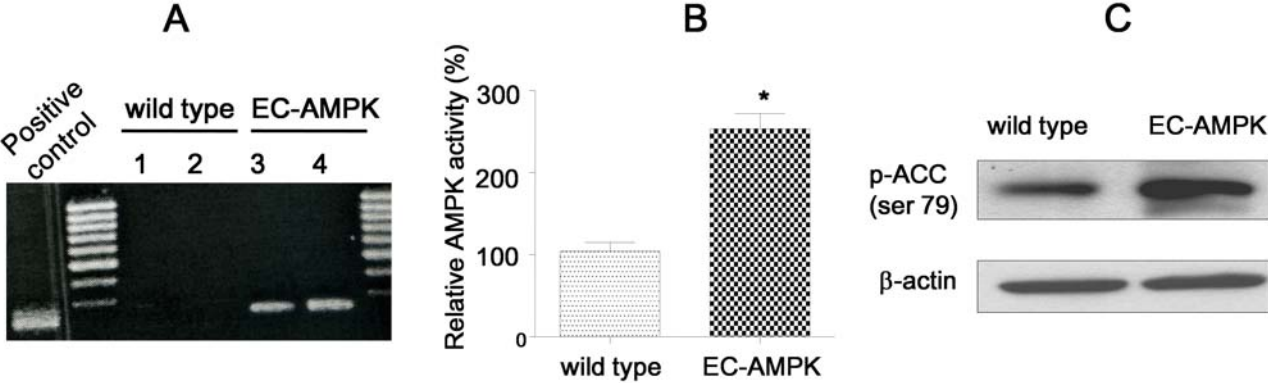

Figure S3

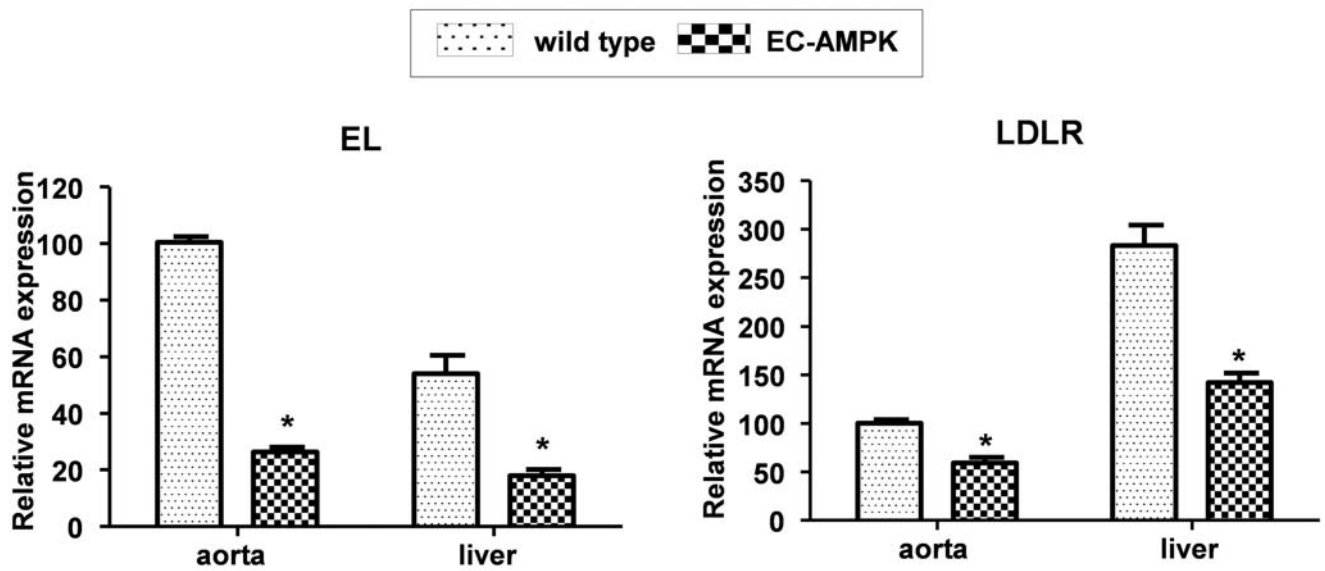

Figure S4

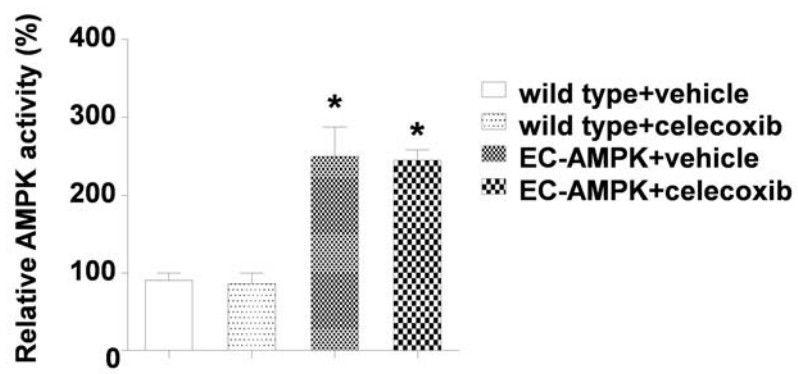

Figure S5

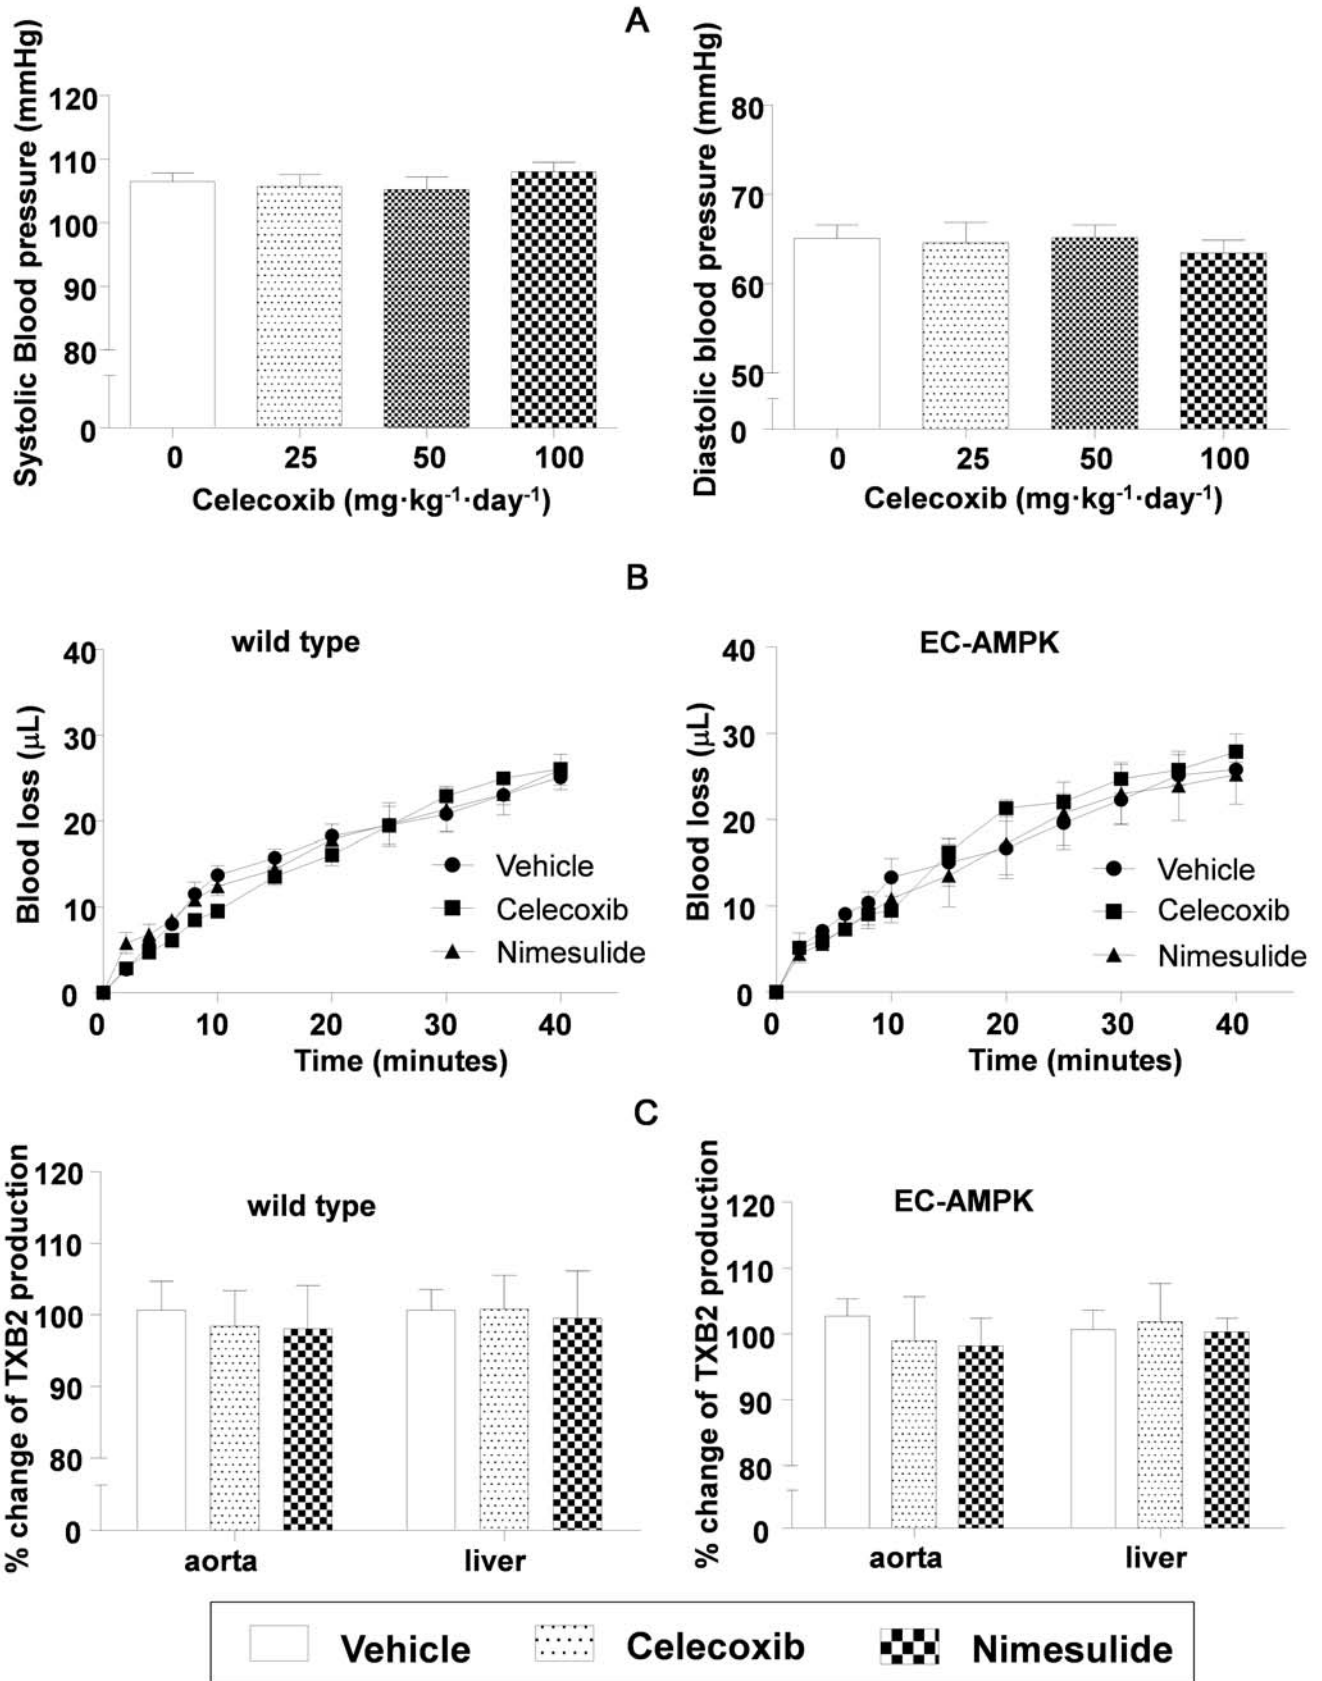

Supplement: bph0171-0498-sd1.pdf [file bph0171-0498-sd1.pdf]
